# Supplementary material
Source: PubMed Central journal article supplement (PMC3498530)
Supplement: NIHMS398757-supplement-supplement_1.pdf [file NIHMS398757-supplement-supplement_1.pdf]

## Supplemental Files for Online Only

**Table S1:** Association between performance on Trailmaking Test analyzed and residential proximity to major roadway excluding participants that could not complete parts A or B within 5 minutes.\*

|                                                  | Change in Score<br>(95% CI) | p-value |
|--------------------------------------------------|-----------------------------|---------|
| <b>Higher Scores Indicate Poorer Performance</b> |                             |         |
| Trailmaking Test                                 |                             |         |
| Part A                                           | 1.5 (-1.2, 4.1)             | 0.28    |
| Part B                                           | 6.8 (1.7, 12.0)             | 0.009   |
| Delta <sup>†</sup>                               | 6.0 (1.8, 10.3)             | 0.006   |

\*Association is expressed as change in test score per interquartile range (851.2 m) decrease in residential distance to major roadways. <sup>†</sup>Trailmaking Test Delta is calculated as the time to complete Part B minus the time to complete Part A of the test.

**Table S2:** Change in score on tests of cognitive function associated with an interquartile range decrease (851.2 m) in residential distance to major roadway, stratified by education and age.\*

| Outcome              | High School or less  | College or more      | P <sub>h</sub> | Age ≤ 77             | Age > 77             | P <sub>h</sub> |
|----------------------|----------------------|----------------------|----------------|----------------------|----------------------|----------------|
| MMSE <26, odds ratio | 0.86 (0.66, 1.12)    | 1.54 (1.10, 2.17)    | 0.007          | 1.34 (1.01, 1.76)    | 0.89 (0.65, 1.21)    | 0.056          |
| HVLТ-R               |                      |                      |                |                      |                      |                |
| Immediate Recall     | -0.36 (-0.97, 0.25)  | -0.66 (-1.15, -0.17) | 0.45           | -0.60 (-1.11, -0.10) | -0.40 (-0.97, 0.17)  | 0.59           |
| Delayed Recall       | -0.31 (-0.69, 0.07)  | -0.40 (-0.71, -0.08) | 0.72           | -0.59 (-0.87, -0.31) | -0.04 (-0.44, 0.37)  | 0.026          |
| Recognition          | 0.10 (-0.18, 0.38)   | 0.05 (-0.12, 0.23)   | 0.76           | 0.08 (-0.09, 0.26)   | 0.05 (-0.23, 0.33)   | 0.83           |
| Letter Fluency       | -1.85 (-3.35, -0.35) | -1.04 (-2.27, 0.18)  | 0.41           | -1.00 (-2.22, 0.23)  | -1.60 (-3.12, -0.08) | 0.54           |
| Category Fluency     | -0.59 (-1.10, -0.09) | -0.87 (-1.36, -0.39) | 0.43           | -1.03 (-1.50, -0.55) | -0.32 (-0.81, 0.16)  | 0.041          |
| Clock-in-the-box     | 0.004 (-0.15, 0.15)  | -0.09 (-0.22, 0.04)  | 0.36           | -0.10 (-0.23, 0.02)  | 0.04 (-0.12, 0.20)   | 0.16           |
| Trailmaking Test     |                      |                      |                |                      |                      |                |
| Part A               | 2.1 (-1.8, 6.0)      | 1.4 (-1.1, 3.9)      | 0.78           | 3.2 (0.9, 5.5)       | -0.66 (-4.6, 3.3)    | 0.11           |
| Part B               | 15.1 (5.9, 24.4)     | 5.6 (-0.1, 11.2)     | 0.085          | 12.9 (6.8, 18.9)     | 3.23 (-4.9, 11.3)    | 0.062          |
| Delta <sup>†</sup>   | 11.3 (3.5, 19.1)     | 4.1 (-0.6, 8.8)      | 0.12           | 10.1 (4.9, 15.3)     | 1.75 (-5.0, 15.3)    | 0.054          |

\*Association is expressed as change in test score per interquartile range (851.2 m) decrease in residential distance to major roadways. P<sub>h</sub> denotes the P-value from the test for homogeneity. <sup>†</sup>Trailmaking Test Delta is calculated as the time to complete Part B minus the time to complete Part A of the test.

**Table S3.** Association between mean annual estimated black carbon levels and performance on tests of cognitive function.\*

|                                                  | Change in test score<br>(95% CI) | p-value |
|--------------------------------------------------|----------------------------------|---------|
| <b>Lower Scores Indicate Poorer Performance</b>  |                                  |         |
| Hopkins Verbal Learning Test                     |                                  |         |
| Immediate Recall                                 | -0.36 (-0.71, -0.01)             | 0.046   |
| Delayed Recall                                   | -0.14 (-0.37, 0.09)              | 0.22    |
| Recognition                                      | 0.03 (-0.12, 0.17)               | 0.73    |
| Letter Fluency                                   | -0.26 (-1.04, 0.53)              | 0.52    |
| Category Fluency                                 | 0.05 (-0.26, 0.35)               | 0.77    |
| Clock-in-the-box                                 | -0.04 (-0.13, 0.05)              | 0.36    |
| <b>Higher Scores Indicate Poorer Performance</b> |                                  |         |
| Trailmaking Test, seconds                        |                                  |         |
| Part A                                           | 0.59 (-2.17, 3.35)               | 0.67    |
| Part B                                           | 2.51 (-2.91, 7.94)               | 0.36    |
| Delta <sup>†</sup>                               | 2.23 (-2.11, 6.57)               | 0.32    |

\*All models are adjusted for age, sex, race, history of stroke, history of smoking, education, visit number, body mass index, physical activity, household income, percent of neighborhood population that is non-white, and percent of neighborhood population with college degree or above. Association is expressed as change in test score per interquartile range (0.11  $\mu\text{g}/\text{m}^3$ ) increase in mean annual residential black carbon levels.

<sup>†</sup>Trailmaking Test Delta is calculated as the time to complete Part B minus the time to complete Part A of the test.
